# Supplementary material
Source: PubMed Central journal article supplement (PMC8641954)
Supplement: mmc1.pdf [file mmc1.pdf]

# THE LANCET Microbe

## Supplementary appendix

This appendix formed part of the original submission. We post it as supplied by the authors.

Supplement to: Wang SY, Juthani PV, Borges KA, et al. Severe breakthrough COVID-19 cases in the SARS-CoV-2 delta (B.1.617.2) variant era. *Lancet Microbe* 2021; published online Dec 3. [https://doi.org/10.1016/S2666-5247\(21\)00306-2](https://doi.org/10.1016/S2666-5247(21)00306-2).

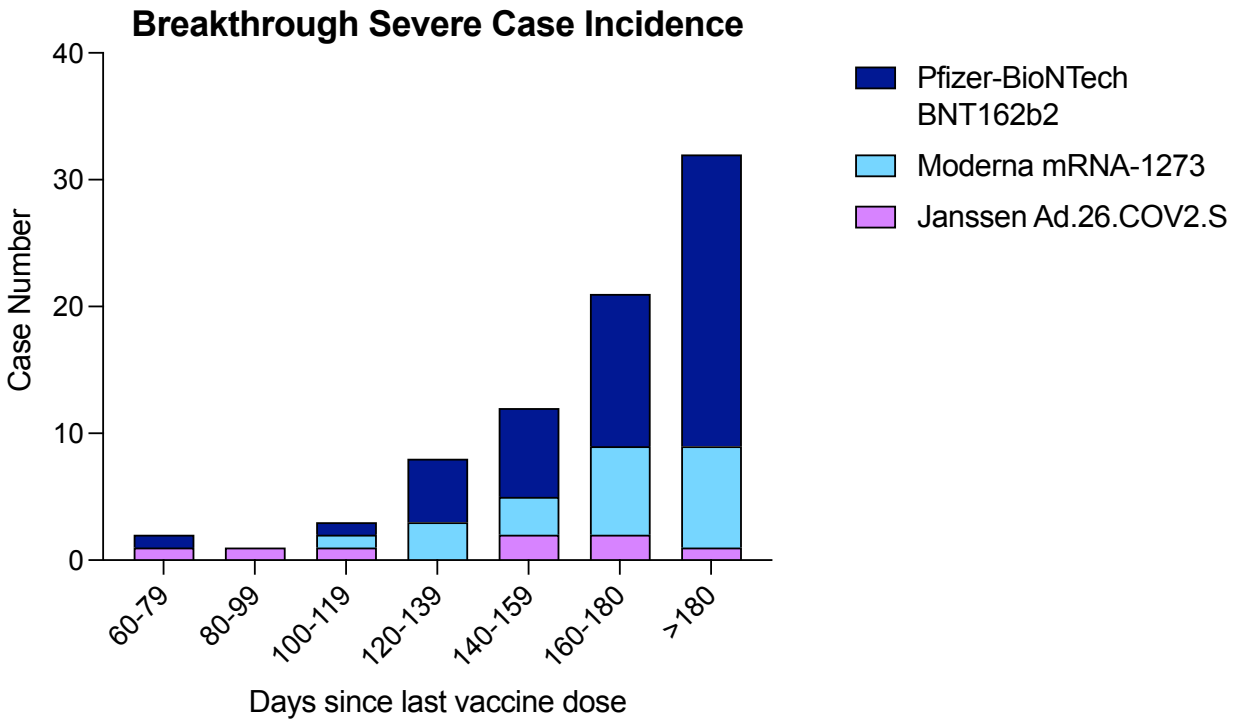

**Figure 1:** Time from last vaccine dose (either first dose of Janssen Ad.26.COV2.S or second dose of Pfizer-BioNTech BNT162b2 or Moderna mRNA-1273) to positive SARS-CoV-2 PCR test in fully vaccinated (at least 14 days after last vaccine dose) patients hospitalized with breakthrough severe COVID-19 infection. Case numbers are sub-categorized by vaccine subtype.

### Unvaccinated Severe/Critical COVID-19 Infection

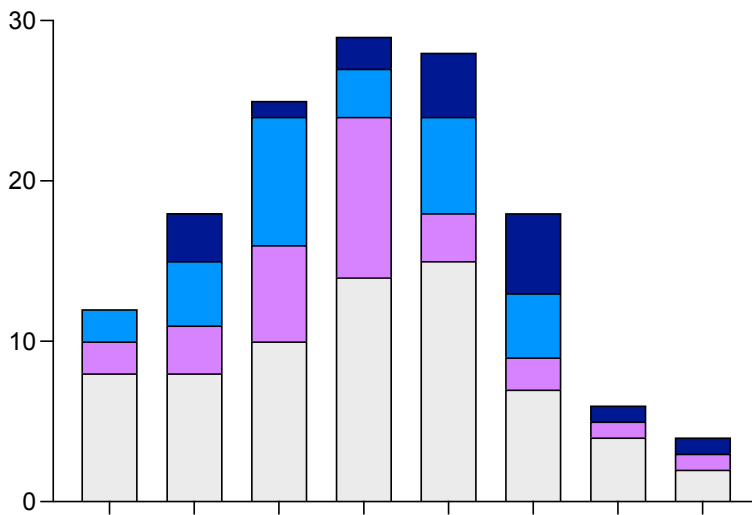

### Breakthrough Severe/Critical COVID-19 Infection

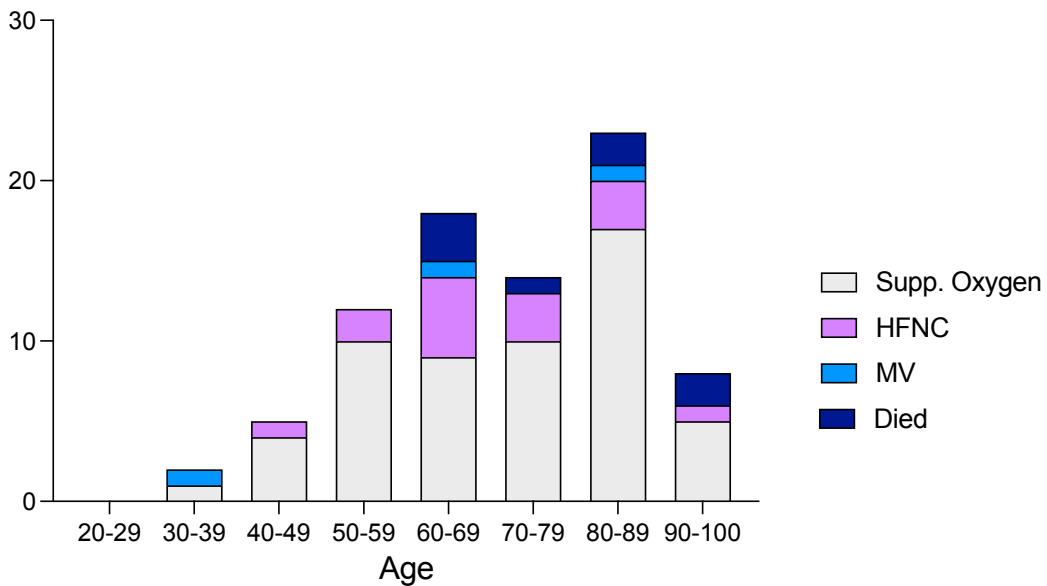

**Figure 2.** Age distribution of severe and critically ill patients with COVID-19 infection. Severe cases are defined as individuals who have SpO<sub>2</sub> <94% on room air. Critical cases are defined as individuals who have respiratory failure, septic shock, and/or multiple organ dysfunction. Deaths are in-hospital deaths related to COVID-19 infection. Supp. Oxygen: supplemental oxygen via nasal cannula; HFNC: high flow nasal cannula; MV: mechanical ventilation.

**Table. Patient demographics by vaccination status.**

|                                          | <b>Unvaccinated<br/>(n=140)</b> | <b>Fully Vaccinated<br/>(n=82)</b> | <b>P-<br/>value</b> |
|------------------------------------------|---------------------------------|------------------------------------|---------------------|
| <b>Age (years, mean (SD))</b>            | 55.2 (17)                       | 71.6 (15)                          | <0.001              |
| <b>Male gender (%)</b>                   | 66 (47)                         | 49 (60)                            | 0.07                |
| <b>Race/Ethnicity (%)</b>                |                                 |                                    | <0.001              |
| <b>White</b>                             | 71 (51)                         | 66 (80)                            |                     |
| <b>Black</b>                             | 42 (30)                         | 11 (13)                            |                     |
| <b>Hispanic</b>                          | 22 (16)                         | 3 (4)                              |                     |
| <b>Other/Unknown</b>                     | 4 (3)                           | 2 (2)                              |                     |
| <b>BMI (kg/m<sup>2</sup>, mean (SD))</b> | 33.6 (9)                        | 29.5 (7)                           | <0.001              |
| <b>CVD (%)</b>                           | 30 (21)                         | 38 (46)                            | <0.001              |
| <b>Lung Disease (%)</b>                  | 24 (17)                         | 28 (34)                            | 0.004               |
| <b>Type 2 Diabetes (%)</b>               | 38 (27)                         | 30 (37)                            | 0.14                |
| <b>History of Malig. (%)</b>             | 8 (6)                           | 17 (21)                            | <0.001              |
| <b>Immunosuppressed<br/>(%)</b>          | 6 (4)                           | 12 (15)                            | 0.006               |

BMI: body mass index; CVD: cardiovascular disease (history of atherosclerotic cardiovascular disease, congestive heart failure); Malig: malignancy; Immunosuppressed: on chronic immunosuppressive agent; *P*-values were determined by student's t-test for age and BMI, otherwise Chi-squared test was used.
